# Supplementary material for: Sulforaphane-Induced Cell Cycle Arrest and Senescence are accompanied by DNA Hypomethylation and Changes in microRNA Profile in Breast Cancer Cells
Source: PubMed Central journal article supplement — Theranostics. 2017 Aug 15;7(14):3461–77. doi: 10.7150/thno.20657 (PMC5596436; doi:10.7150/thno.20657), 2017-08-15

## Supplementary Material

### Fig. S1.

SFN-induced apoptosis in breast cancer cells. (A) Annexin V staining. (B) Multicaspase assay. Apoptosis was analyzed using flow cytometry (Muse™ Cell Analyzer) and Muse™ Annexin V and Dead Cell Assay Kit and Muse™ Multi-caspase Assay Kit. (A) SFN did not promote apoptosis in normal human mammary epithelial cells (HMEC). (B) As a positive control, 30 min treatment with 10 mM hydrogen peroxide was considered (C+). Bars indicate SD, n = 3, \*\*\* $p < 0.001$ , \*\* $p < 0.01$ , \* $p < 0.05$  compared to the control (ANOVA and Dunnett's *a posteriori* test). SFN, sulforaphane.

### Fig. S2.

SFN-mediated ERK1/2 activity in breast cancer cells. ERK1/2 activity was measured using flow cytometry (Muse™ Cell Analyzer) and Muse™ MAPK Activation Dual Detection Kit. Bars indicate SD, n = 3, \*\*\* $p < 0.001$ , \*\* $p < 0.01$ , \* $p < 0.05$  compared to the control (ANOVA and Dunnett's *a posteriori* test). SFN, sulforaphane.

Fig. S1.

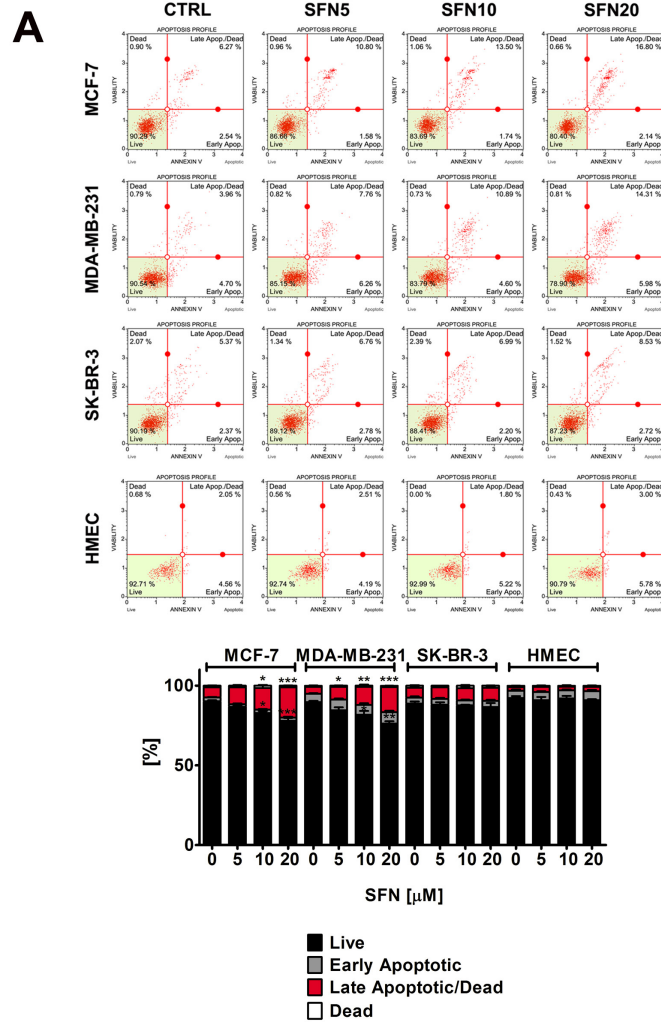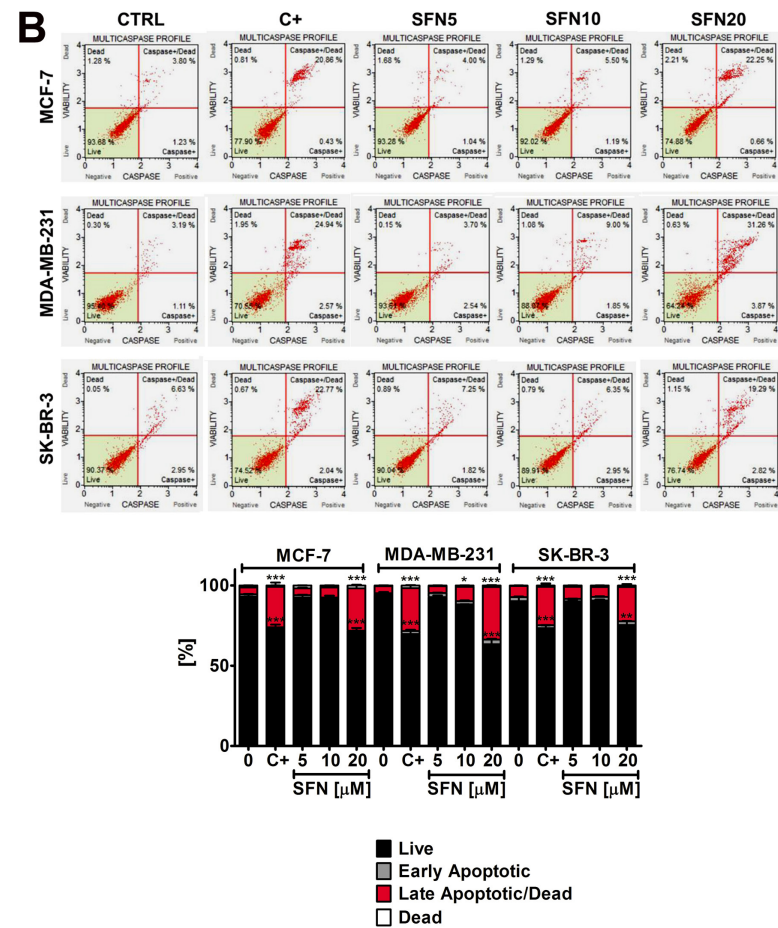

Fig. S2.

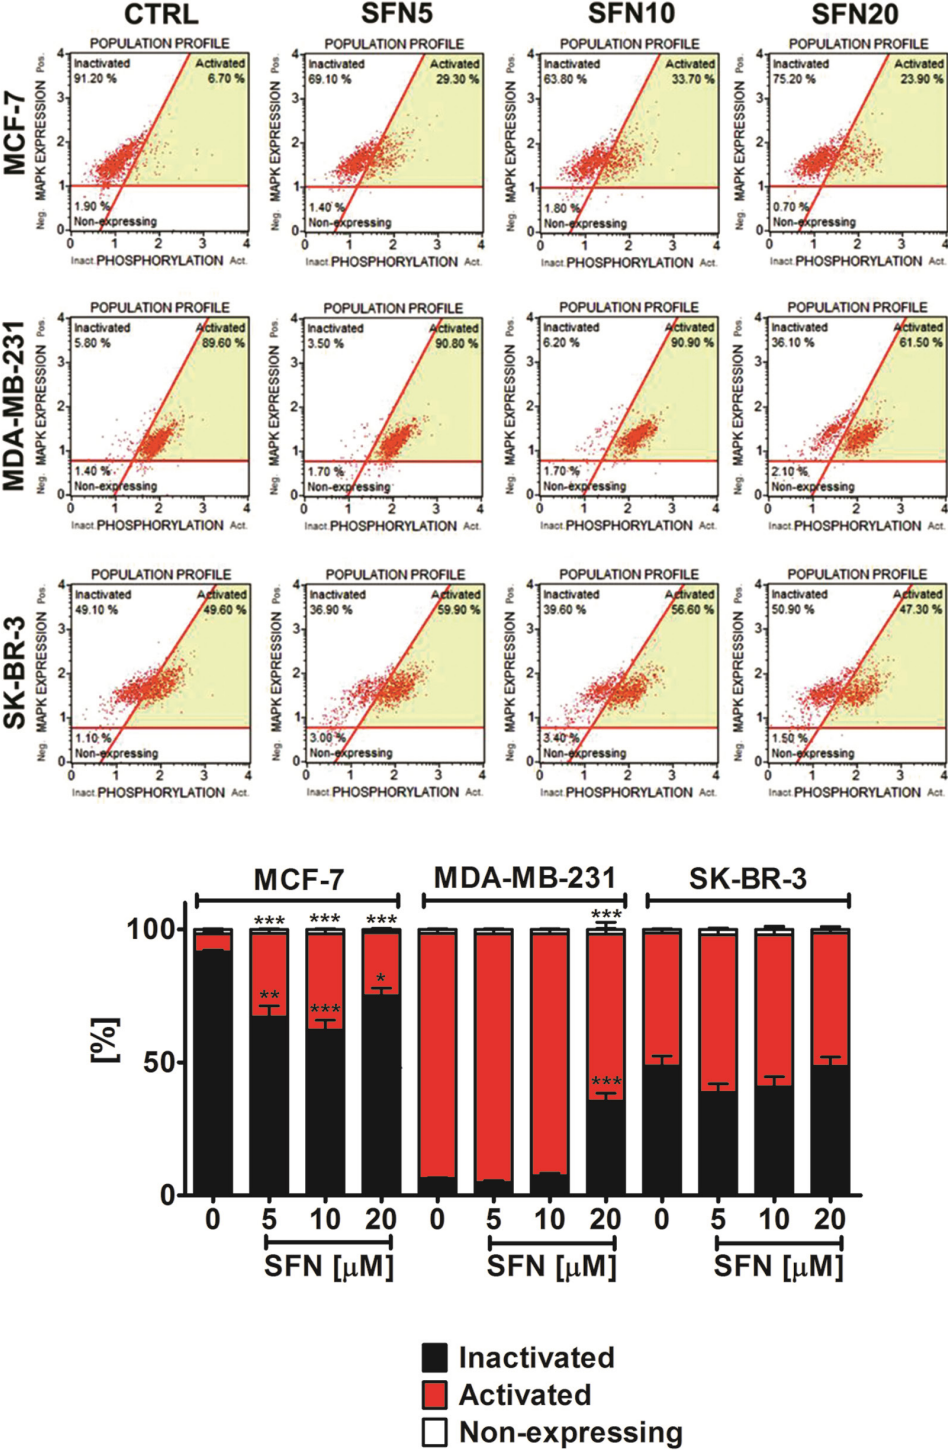

Supplement: thnov07p3461s1.pdf [file thnov07p3461s1.pdf]
